# Supplementary material for: Pretraining Skills as Predictors of Competence of Nonspecialists in Delivery of Mental Health Services
Source: Atypon-hosted journal article supplement (doi:10.1176/appi.ps.202100691), 2023-01-10
Supplement: appi.ps.202100691.ds001.pdf [file appi.ps.202100691.ds001.pdf]

*Follow-up characteristics of participants receiving mental health training (n=185)*

| <b>Characteristic</b>                                                            | <b>4-months post-training, n=185 (%)</b> | <b>Group differences between participants at post-training and those missing at post-training, Chi-square (p)</b> |
|----------------------------------------------------------------------------------|------------------------------------------|-------------------------------------------------------------------------------------------------------------------|
| <b>Gender</b>                                                                    |                                          |                                                                                                                   |
| Female                                                                           | 84 (45%)                                 | 1.54 (0.21)                                                                                                       |
| Male                                                                             | 101 (55%)                                |                                                                                                                   |
| <b>Age</b>                                                                       |                                          |                                                                                                                   |
| 21-29 years                                                                      | 64 (35%)                                 | 3.58 (0.31)                                                                                                       |
| 30-39 years                                                                      | 51 (28%)                                 |                                                                                                                   |
| 40-49 years                                                                      | 50 (27%)                                 |                                                                                                                   |
| 50+ years                                                                        | 20 (11%)                                 |                                                                                                                   |
| <b>Caste*/Ethnicity</b>                                                          |                                          | 2.46 (0.12)                                                                                                       |
| High caste groups                                                                | 133 (72%)                                |                                                                                                                   |
| Lower caste groups and ethnic minorities                                         | 52 (28%)                                 |                                                                                                                   |
| <b>Type of primary care provider</b>                                             |                                          | 0.36 (0.55)                                                                                                       |
| Primary care provider without prescribing rights (e.g., auxiliary nurse midwife) | 87 (47%)                                 |                                                                                                                   |
| Primary care provider with prescribing rights (e.g., health assistant)           | 98 (53%)                                 |                                                                                                                   |
| <b>Years working in healthcare services</b>                                      |                                          | 7.80 (0.05)                                                                                                       |
| < 1 year                                                                         | 9 (5%)                                   |                                                                                                                   |
| 1-5 years                                                                        | 51 (28%)                                 |                                                                                                                   |
| 6-10 years                                                                       | 25 (14%)                                 |                                                                                                                   |
| > 10 years                                                                       | 99 (54%)                                 |                                                                                                                   |

\* Social stratification that in Nepal is closely correlated with ethnicity.

*Bivariate associations between interpersonal skill and demographic variables and outcome of “acceptable” competence*

| <b>Variable</b>                                                        | <b>Unadjusted OR (p)**</b> |
|------------------------------------------------------------------------|----------------------------|
| Interpersonal skills                                                   |                            |
| Nonverbal communication                                                | 2.24 (0.002)               |
| Verbal communication                                                   | 1.64 (0.09)                |
| Rapport building                                                       | 1.49 (0.19)                |
| Empathy/warmth                                                         | 2.15 (0.01)                |
| Gender                                                                 |                            |
| Male                                                                   | 0.38 (0.005)               |
| Age                                                                    | 0.98 (0.20)                |
| Caste**/Ethnicity                                                      |                            |
| High caste groups                                                      | 1.87 (0.12)                |
| Type of primary care provider                                          |                            |
| Primary care provider with prescribing rights (e.g., health assistant) | 2.67 (0.005)               |
| Years working in healthcare services                                   | 0.98 (0.30)                |

\* Outcome at the 75% threshold

\*\* Social stratification that in Nepal is closely correlated with ethnicity

*Logistic regression models examining pre- to post-training improvement in interpersonal skills as predictors of post-training “acceptable” competence (n=185)*

|                                                                 | <i>75% threshold</i> |                |               |             |                 | <i>65% threshold</i> |                |                   |             |                 |
|-----------------------------------------------------------------|----------------------|----------------|---------------|-------------|-----------------|----------------------|----------------|-------------------|-------------|-----------------|
|                                                                 | Log odds             | Standard error | p-value       | Odds ratio  | OR 95% CI       | Log odds             | Standard error | p-value           | Odds ratio  | OR 95% CI       |
| <i>Intercept (no improvement in interpersonal skills score)</i> | -1.78                | 0.32           | <0.01         | -           | -               | -0.59                | 0.26           | 0.02              | -           | -               |
| Unit of improvement in interpersonal skills score               | <b>0.28</b>          | <b>0.09</b>    | <b>0.002*</b> | <b>1.32</b> | <b>1.1, 1.6</b> | <b>0.34</b>          | <b>0.08</b>    | <b>&lt;0.001*</b> | <b>1.40</b> | <b>1.2, 1.7</b> |
